# Supplementary material for: A TCR-based Chimeric Antigen Receptor
Source: PubMed Central journal article supplement (PMC5587706; doi:10.1038/s41598-017-11126-y), 2017-09-06
Supplement: 41598_2017_11126_MOESM1_ESM.pdf [file 41598_2017_11126_MOESM1_ESM.pdf]

Supplementary Figure

## **A TCR-based Chimeric Antigen Receptor**

**Even Walseng, Hakan Köksal, Ibrahim M. Sektioglu, Anne Fåne, Gjertrud Skorstad, Gunnar Kvalheim, Gustav Gaudernack, Else Marit Inderberg, Sébastien Wälchli**

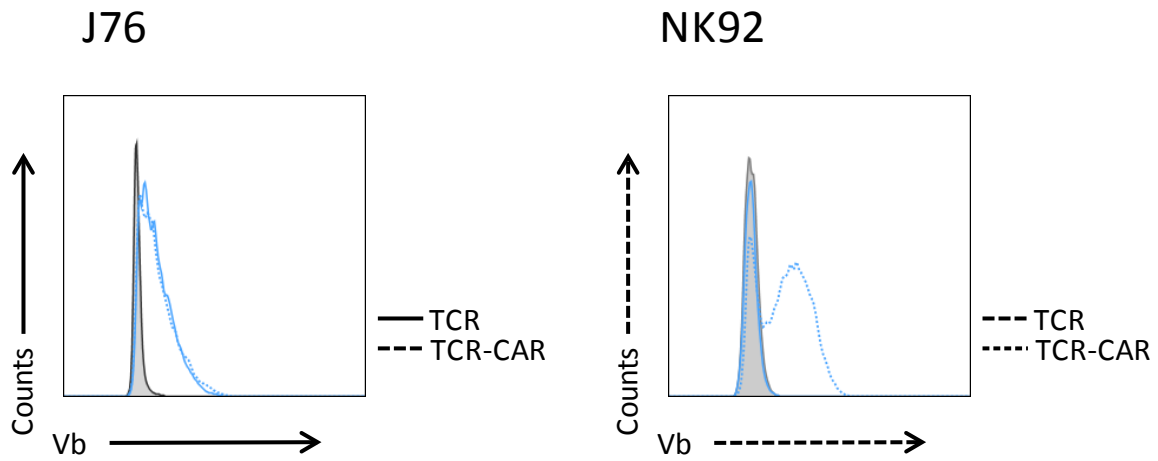

**Supplementary Figure S1: Expression analysis of Radium-1 TCR and TCR-CAR** J76 and NK-92 cells were electroporated with water (grey), Radium-1 TCR mRNA (solid line) or Radium-1 TCR-CAR mRNA (dashed line). Expression of Radium-1 was detected using anti-Vb3 antibody (Vb) and analysed by flow cytometry 18 hours after electroporation. These data are representative of two separated experiments.
